# Supplementary material for: The conversion of α-pinene to cis-pinane using a nickel catalyst supported on a discarded fluid catalytic cracking catalyst with an ionic liquid layer
Source: Royal Society of Chemistry journal article supplement (doi:10.1039/c9ra00675c), 2019-01-01
Supplement: c9ra00675c1.pdf [file c9ra00675c1.pdf]

**The conversion of  $\alpha$ -pinene to *cis*-pinane using a nickel catalyst  
supported on discarded fluid catalytic cracking catalyst with an ionic  
liquid layer**

Shunyou Hu<sup>a</sup>, Linlin Wang<sup>a,b,\*</sup>, Xiaopeng Chen<sup>a,b</sup>, Xiaojie Wei<sup>a,b</sup>, Zhangfa Tong<sup>a,b</sup>, Lijiang Yin<sup>a</sup>

a. School of Chemistry and Chemical Engineering, Guangxi University, Nanning 530004, P. R. China. E-mail: wanglinlin1971@sina.com; Fax: +86-771-323-3718; Tel: +86-771-3272702

b. Guangxi Key Laboratory of Petrochemical Resource Processing and Process Intensification Technology, Nanning 530004, P. R. China

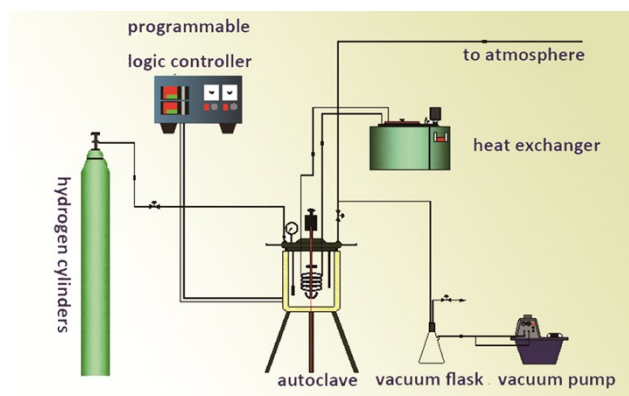

Scheme S1 Schematic illustration of the set up for the hydrogenation of  $\alpha$ -pinene.

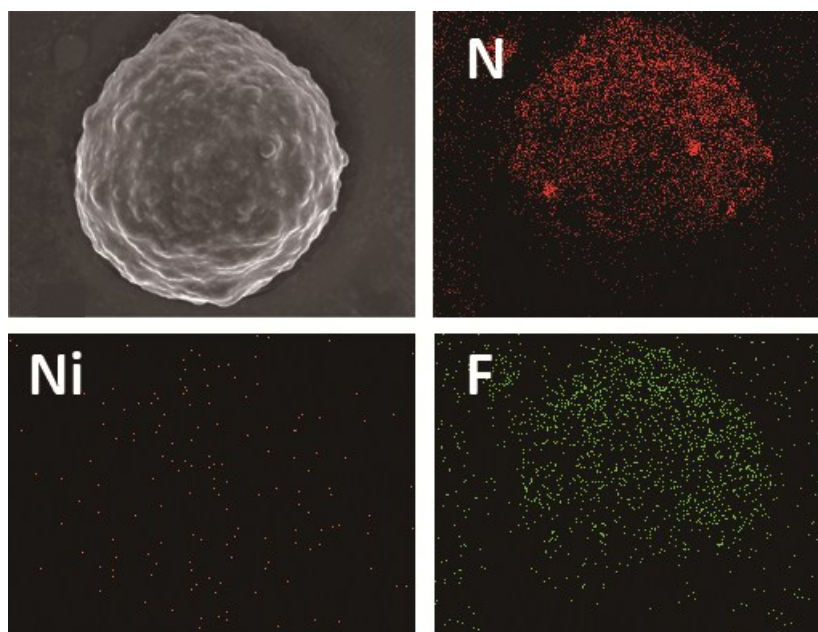

Fig. S1 EDS mapping of the SCILL catalyst for Ni, N, F.

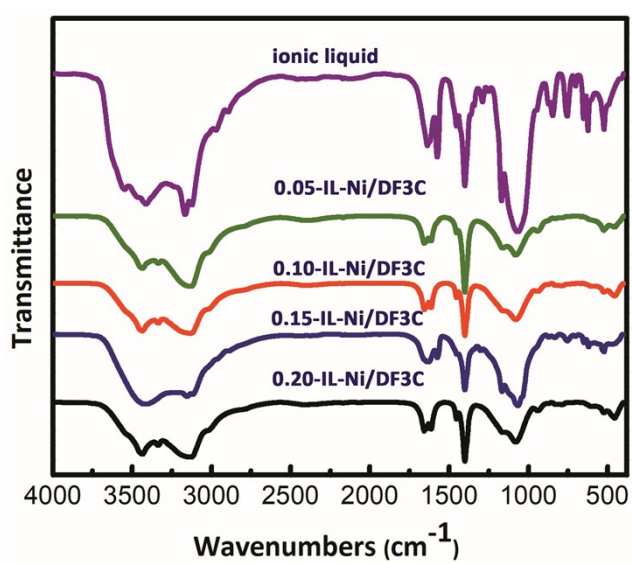

Fig. S2 FTIR spectra of ionic liquid and different ionic liquid loading of the catalyst.

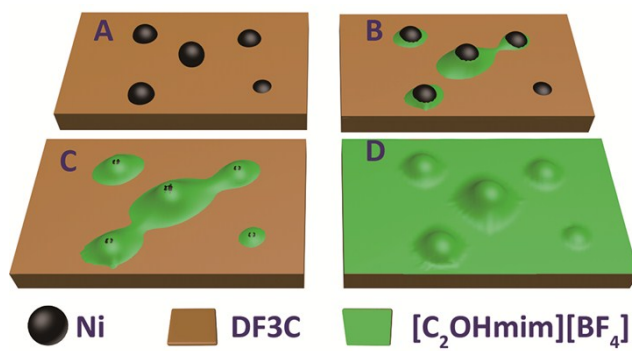

Scheme S2 Ni/DF3C with various of ionic liquid loading.

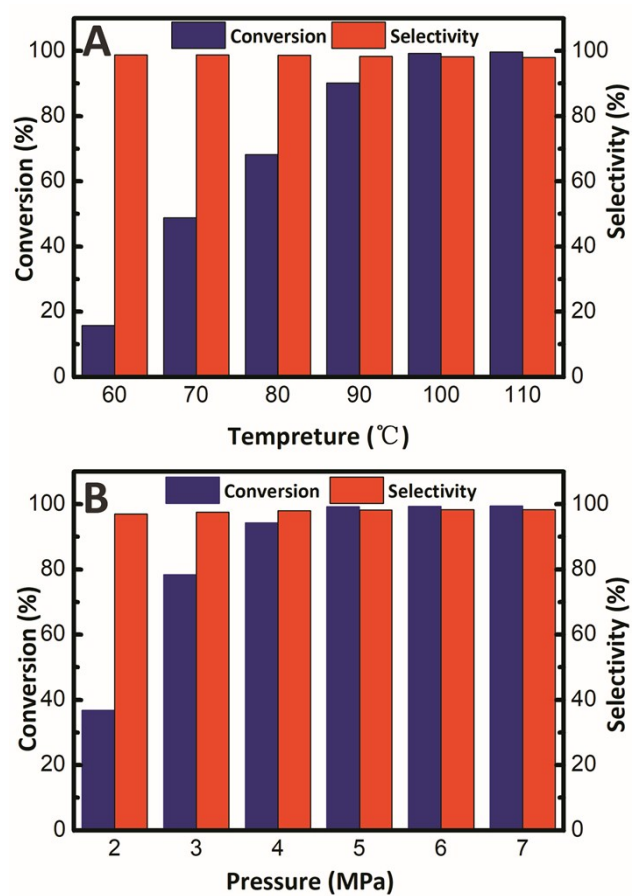

Fig. S3 The effect of temperature (A) and H<sub>2</sub> pressure (B) on the catalytic performance.

Table S1. The effect of different kinds of ionic liquid coating on the catalytic performance.

| Catalyst | Ionic liquid                             | <i>MLs</i> | Conversion (%) | Selectivity (%) |
|----------|------------------------------------------|------------|----------------|-----------------|
| Ni/DF3C  | Free                                     | 0          | 99.47          | 87.94           |
| SCILL    | [EMIM][BF <sub>4</sub> ]                 | ~1         | 99.14          | 88.73           |
| SCILL    | [C <sub>2</sub> OHmim][BF <sub>4</sub> ] | ~1         | 99.06          | 98.26           |

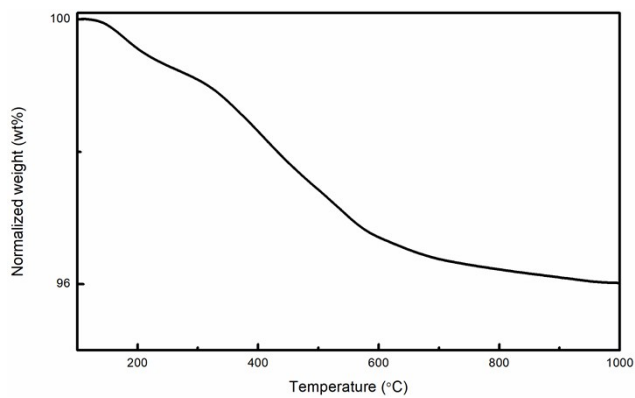

Fig. S4 TGA of the used SCILL catalyst after 20 runs.
